# Supplementary material
Source: publisher figshare collection journal article supplement (https://gsajournals.figshare.com/articles/dataset/_/13553690)

## A Correlations between repeats

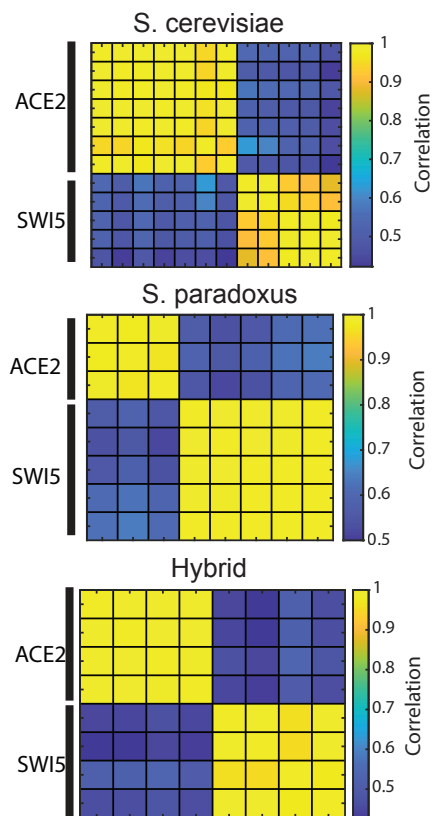

## B Meta-Gene profiles

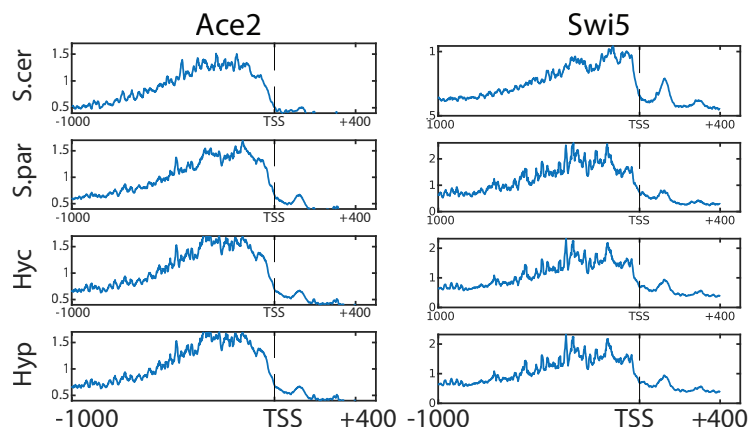

## C Hybrid - orthologs binding to *S. cer* genome

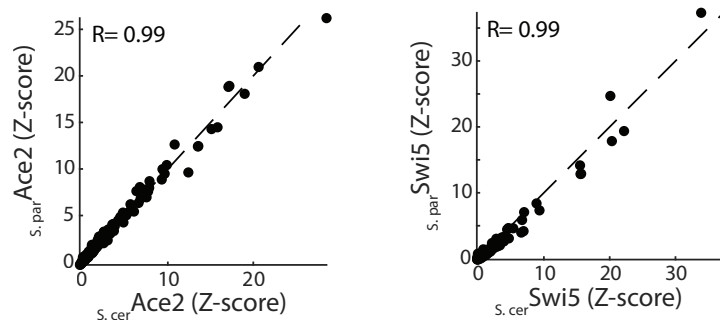

## D Ace2 - haploid vs diploid

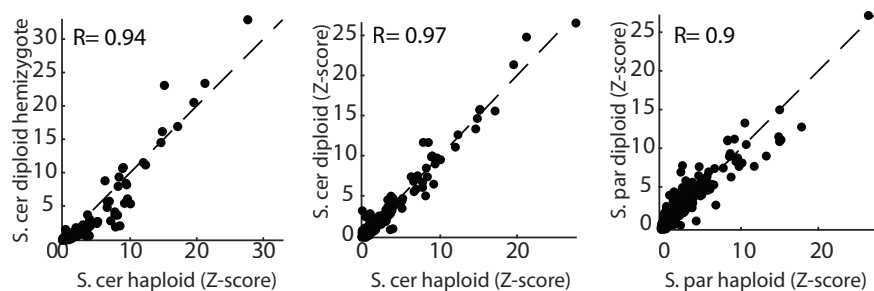

## E Ace2 binding on AMN1 promoter

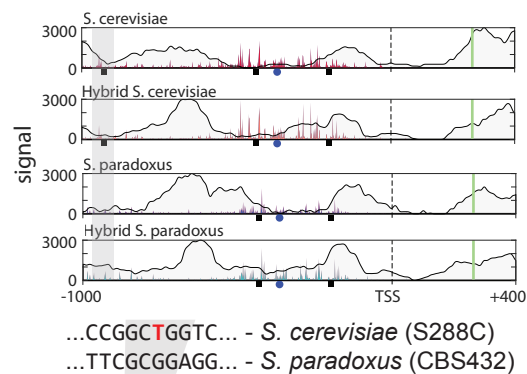

## F Ace2 binding on CLN3 promoter

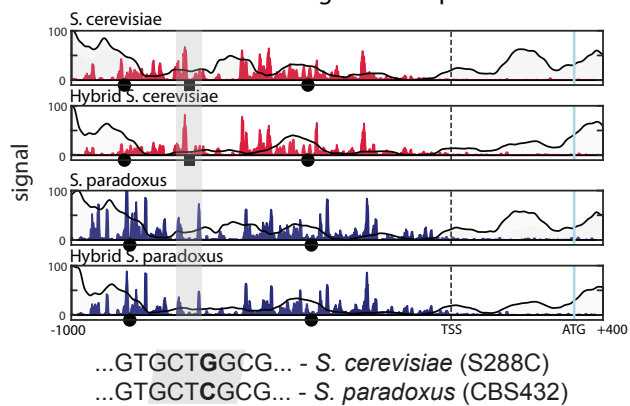

## G

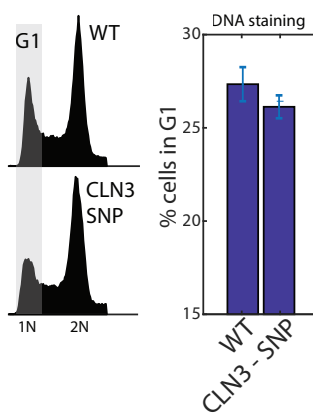

## H

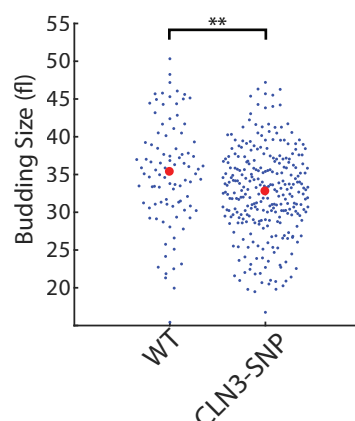

Supplement: Supplementary file 4 [file 1]
