# Supplementary material
Source: publisher figshare collection journal article supplement (https://gsajournals.figshare.com/articles/dataset/_/13553690)

A

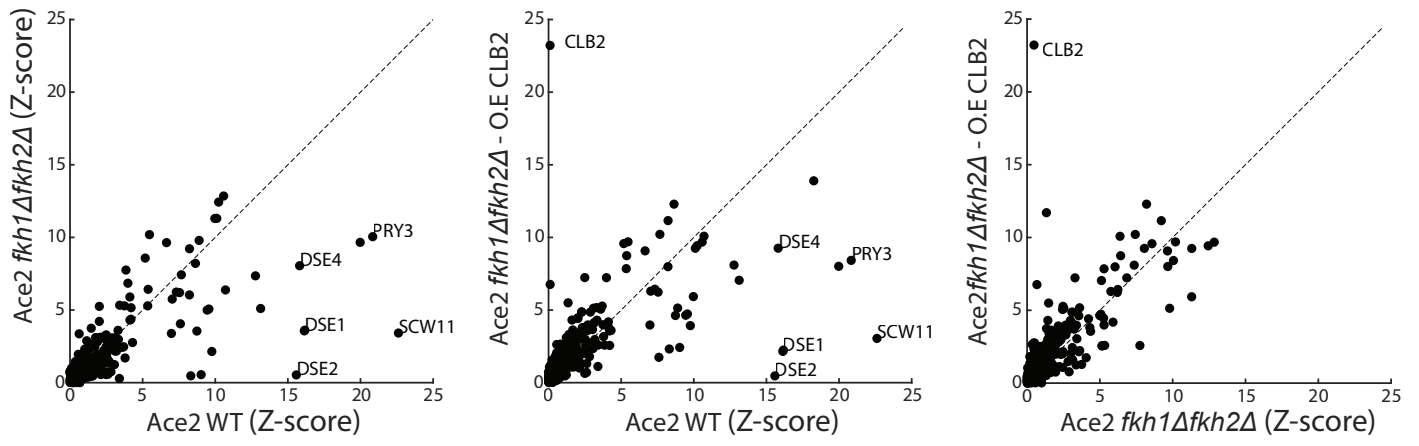

B

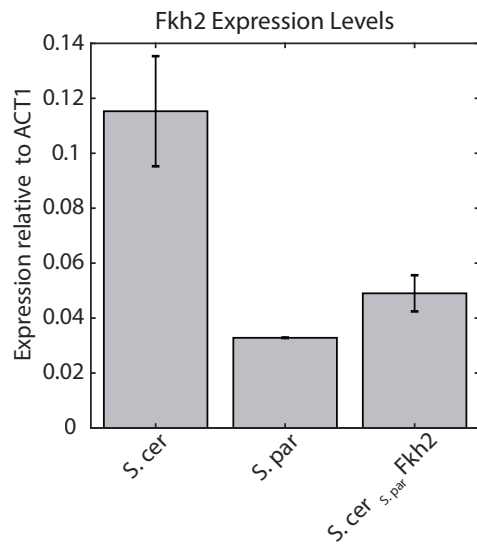

C

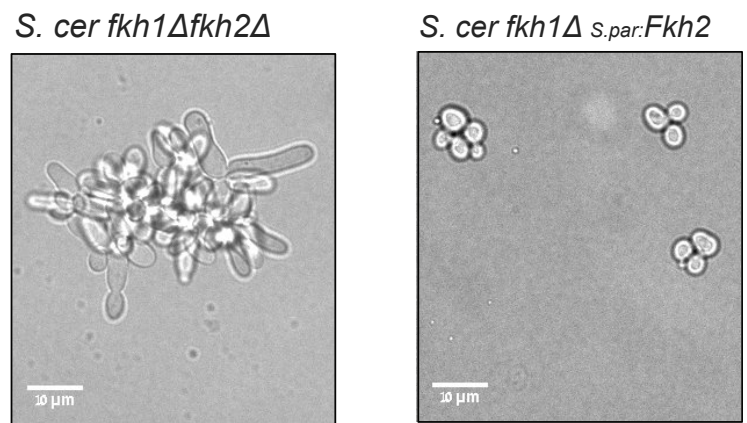

Supplement: Supplementary file 1 [file 1]

Figure S1

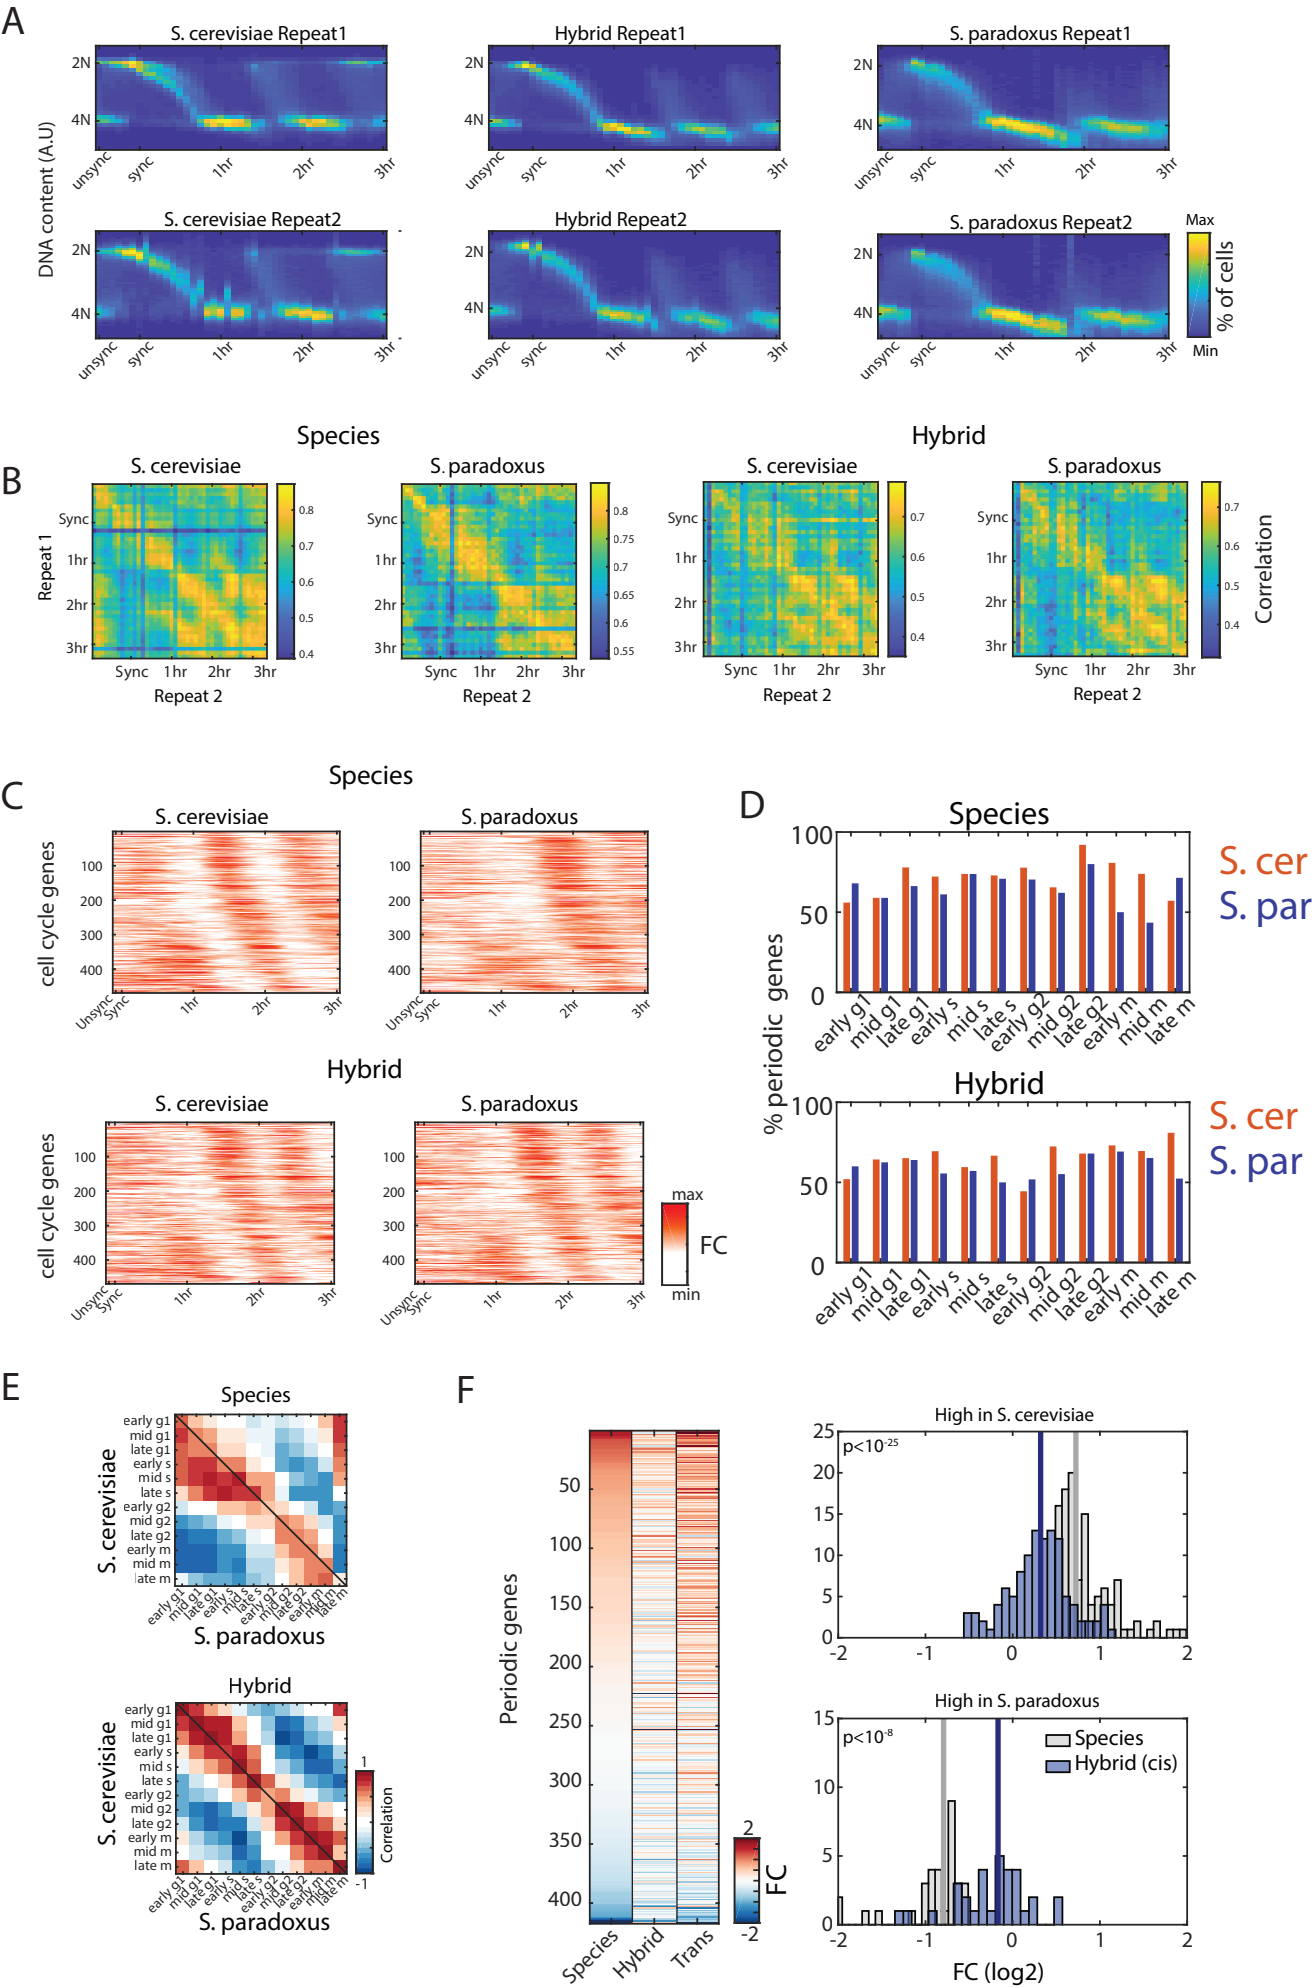

Supplement: Supplementary file 2 [file 1]

A

Correlations between repeats

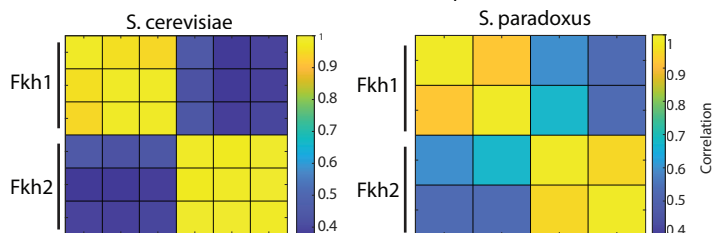

B

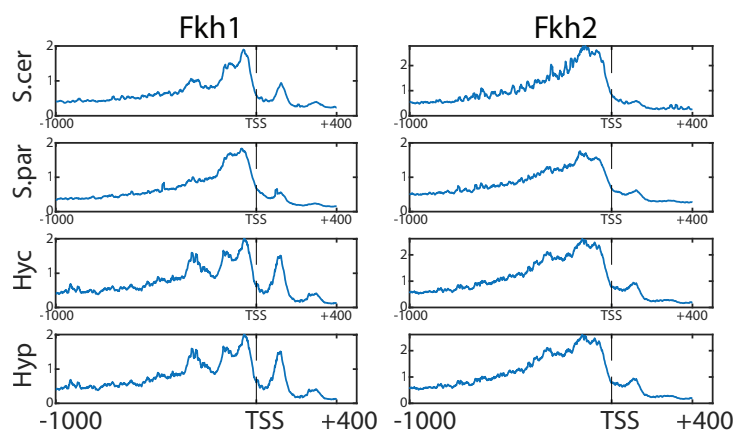

C

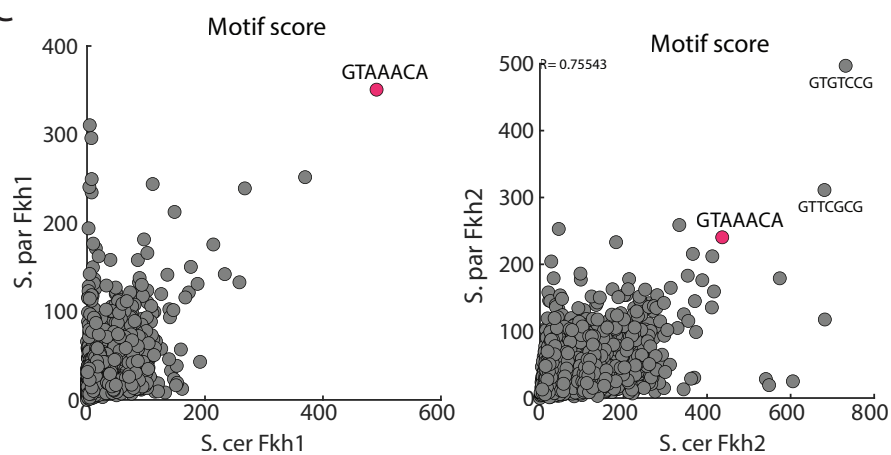

D

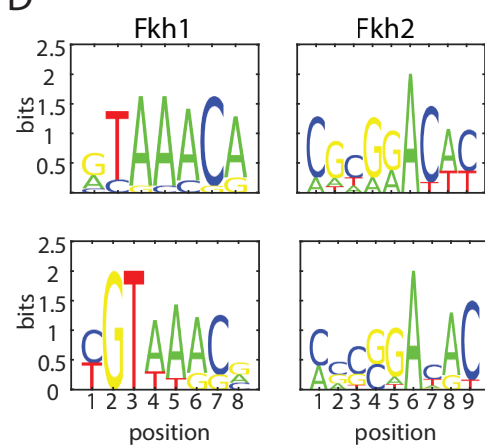

Supplement: Supplementary file 3 [file 1]

**A** TFs targets (MacIsaac et al.)

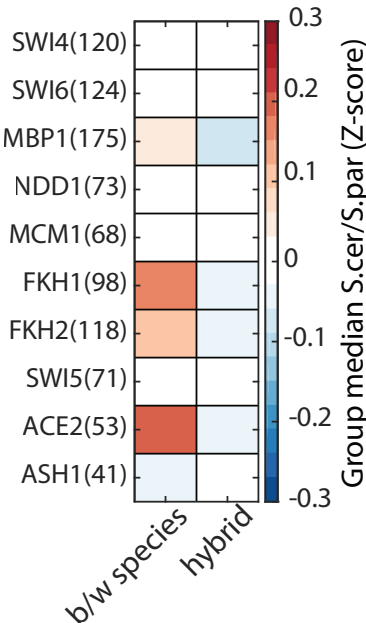

**B** Ace2 targets (voth et al.)

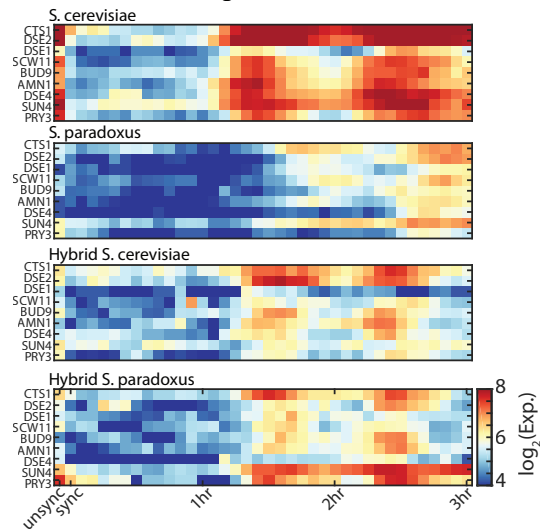

Supplement: Supplementary file 5 [file 1]
